# Supplementary material for: Continuous and simultaneous measurement of the biophysical properties of blood in a microfluidic environment
Source: Royal Society of Chemistry journal article supplement (doi:10.1039/c6an01593j), 2016-01-01
Supplement: c6an01593j1.pdf [file c6an01593j1.pdf]

## **Supplementary Material**

### **Continuous and simultaneous measurement of blood biophysical properties in a microfluidic environment**

Yang Jun Kang

Department of Mechanical Engineering, Chosun University, Gwangju, Republic of Korea

Address: 309 Pilmun-daero, Dong-gu, Gwangju, Republic of Korea.

Fax: +82-62-234-7055, E-mail: [yjkang2011@chosun.ac.kr](mailto:yjkang2011@chosun.ac.kr)

**Table S1.** Overview of previous methods for measuring blood biophysical properties

| Authors                                      | Blood Biophysical Properties |                 |                 | Proposed Method               | Comparison |              |
|----------------------------------------------|------------------------------|-----------------|-----------------|-------------------------------|------------|--------------|
|                                              | Viscosity                    | Viscoelasticity | RBC Aggregation |                               | Continuous | Simultaneous |
| P. Guillot <i>et al</i> <sup>40</sup>        | 0                            | x               | x               | Parallel Flow Method          | 0          | x            |
| S. A. Vanapalli <i>et al</i> <sup>41</sup>   | 0                            | x               | x               |                               | x          | x            |
| S. Choi <i>et al</i> <sup>42</sup>           | 0                            | x               | x               |                               | x          | x            |
| D. E. Solomon <i>et al</i> <sup>43</sup>     | 0                            | x               | x               |                               | 0          | x            |
| N. Srivastava <i>et al</i> <sup>44</sup>     | 0                            | x               | x               | Surface Tension-driven method | x          | x            |
| Z. Han <i>et al</i> <sup>45</sup>            | 0                            | x               | x               |                               | x          | x            |
| N. Morhell <i>et al</i> <sup>46</sup>        | 0                            | x               | x               | Microfluidic Channel Array    | x          | x            |
| Y. J. Kang <i>et al</i> <sup>37</sup>        | 0                            | x               | x               |                               | 0          | x            |
| Y. J. Kang <i>et al</i> <sup>47</sup>        | 0                            | x               | x               | Flow Switching Method         | 0          | x            |
| Y. J. Kang <i>et al</i> <sup>2</sup>         | 0                            | x               | x               |                               | x          | x            |
| Y. J. Kang <i>et al</i> <sup>48</sup>        | 0                            | x               | x               | Droplet-based Plug            | x          | x            |
| E. L. Dahl <i>et al</i> <sup>49</sup>        | 0                            | x               | x               |                               | 0          | x            |
| M. F. DeLaMarre <i>et al</i> <sup>50</sup>   | 0                            | x               | x               | Cell Stretching               | 0          | x            |
| S. Cha <i>et al</i> <sup>51</sup>            | x                            | 0               | x               |                               | 0          | x            |
| S. Sakuma <i>et al</i> <sup>52</sup>         | x                            | 0               | x               | Shape variations              | 0          | x            |
| Y. J. Kang <i>et al</i> <sup>53</sup>        | 0                            | 0               | x               | Reverse Flow Switching        | x          | 0            |
| G. Tomaiuolo <i>et al</i> <sup>8</sup>       | x                            | 0               | x               | Velocity and Shape            | 0          | x            |
| A. E. Ekpenyong <i>et al</i> <sup>7</sup>    | x                            | 0               | x               | Optical Stretcher             | x          | x            |
| M. Brust <i>et al</i> <sup>9</sup>           | x                            | 0               | x               | Extensional Flow              | x          | x            |
| P. C. Sousa <i>et al</i> <sup>54</sup>       | x                            | 0               | x               |                               | 0          | x            |
| G. Du <i>et al</i> <sup>55</sup>             | x                            | 0               | x               | Actuated Flexible Membrane    | x          | x            |
| D. N. Hohne <i>et al</i> <sup>56</sup>       | x                            | 0               | x               |                               | x          | x            |
| G. F. Christopher <i>et al</i> <sup>57</sup> | x                            | 0               | x               | Dynamic Oscillatory Strain    | x          | x            |
| A. E. Koser <i>et al</i> <sup>58</sup>       | x                            | 0               | x               | Velocity Profile              | 0          | x            |
| J. Zile <i>et al</i> <sup>59</sup>           | x                            | 0               | x               | Elastic Instability           | 0          | x            |
| E. Yeom <i>et al</i> <sup>20</sup>           | x                            | x               | 0               | Average Velocity              | x          | x            |
| S. Shin <i>et al</i> <sup>21</sup>           | x                            | x               | 0               | Back Scattering               | x          | x            |
| O. K. Baskurt <i>et al</i> <sup>24</sup>     | x                            | x               | 0               | Electrical Impedance          | x          | x            |
